# Supplementary material for: Attenuation of neurovirulence of chikungunya virus by a single amino acid mutation in viral E2 envelope protein
Source: PubMed Central journal article supplement (PMC10792792; doi:10.1186/s12929-024-00995-x), 2024-01-17
Supplement: 12929_2024_995_MOESM1_ESM.pdf [file 12929_2024_995_MOESM1_ESM.pdf]

**Table S1. Mouse clinical scoring system in the CHIKV Balb/C mouse model.**

|                    | <b>0</b>                          | <b>1</b>                                              | <b>2</b>                             | <b>3</b>                                       |
|--------------------|-----------------------------------|-------------------------------------------------------|--------------------------------------|------------------------------------------------|
| <b>Activity</b>    | Normal                            | Isolated, lethargy, abnormal posture                  | Huddled, inactive or overactive      | Moribund or seizing                            |
| <b>Breathing</b>   | Normal                            | Rapid, shallow                                        | Rapid, abdominal                     | Laboured                                       |
| <b>Movement</b>    | Normal                            | Slight incoordination                                 | Single limb dragging/paralysis       | Staggering, paralysis, multiple limbs dragging |
| <b>Body Weight</b> | Normal (Gaining weight 0.51g/day) | Stopped or markedly reduced growth (5% loss over 24h) | Weight loss >15% or up to 10% in 24h | Weight loss >20% or >10% over 24h              |

**Table S2. Nucleotide and amino acid differences between CHIKVBP and CHIKV-SP based on BigDye™ Terminator sequencing data analysis.**

|                    | Position | CHIKV-BP      | CHIKV-SP       |
|--------------------|----------|---------------|----------------|
| Nucleotide         | 5459     | C             | T              |
|                    | 8677     | G             | A              |
| Amino acid residue | nsP3-471 | Serine (Ser)  | Proline (Pro)  |
|                    | E2-55    | Glycine (Gly) | Arginine (Arg) |
